1 **Development of clinical virtual care pathways to engage and support families requiring**  
2 **neonatal intensive care in response to the COVID-19 pandemic (COVES Study)**

3  
4 Marsha Campbell-Yeo<sup>1-5\*</sup>  
5 Justine Dol<sup>2,4</sup>  
6 Brianna Richardson<sup>1,4</sup>  
7 Holly McCulloch<sup>4</sup>  
8 Amos Hundert<sup>4</sup>  
9 Sarah Foye<sup>4</sup>  
10 Jon Dorling<sup>3</sup>  
11 Jehier Afifi<sup>3</sup>  
12 Tanya Bishop<sup>5</sup>  
13 Rebecca Earle<sup>5</sup>  
14 Annette Elliott Rose<sup>5</sup>  
15 Darlene Inglis<sup>5</sup>  
16 Theresa Kim<sup>5</sup>  
17 Carye Leighton<sup>6</sup>  
18 Sally Loring<sup>7</sup>  
19 Gail MacRae<sup>5</sup>  
20 Andrea Melanson<sup>5</sup>  
21 David C Simpson<sup>3</sup>  
22 Michael Smit<sup>8</sup>  
23 Leah Whitehead<sup>6</sup>

24  
25 1 School of Nursing, Dalhousie University, Halifax, Nova Scotia, Canada  
26 2 Faculty of Health, Dalhousie University, Halifax, Nova Scotia, Canada  
27 3 Department of Pediatrics, IWK Health & Dalhousie University, Halifax, Nova Scotia Canada  
28 4 Centre for Pediatric Pain Research, IWK Health, Halifax, Nova Scotia, Canada  
29 5 IWK Health, Halifax, Nova Scotia, Canada  
30 6 Parent Partner, Neonatal Intensive Care Unit, IWK Health, Halifax, Nova Scotia, Canada  
31 7 Nova Scotia Health Authority, Nova Scotia, Canada  
32 8 School of Information Management, Dalhousie University, Halifax, Nova Scotia, Canada

33  
34 \* Correspondence:

35 Marsha Campbell-Yeo, School of Nursing, Faculty of Health, Dalhousie University, Halifax,  
36 NS, Canada, Marsha.Campbell-Yeo@dal.ca

37 **Keywords:** virtual pathways; co-design; COVID-19; neonatal intensive care

38  
39 **Word Count: 4576**

40 **Figures: 4**

41

42

43 **Abstract 334/350 words**

44 **Background:** In response to the COVID-19 pandemic, family presence restrictions in neonatal  
45 intensive care units (NICU) were enacted to limit disease transmission and protect infants,  
46 families, and healthcare providers. The effects of pandemic parental restrictions on providing  
47 optimal family integrated neonatal care is unknown.

48 **Aim:** To ensure optimal neonatal care using virtual care pathways to engage and support families  
49 in response to parental presence restrictions imposed during the COVID-19 pandemic. The  
50 research had two objectives: (1) conduct a needs assessment with families and healthcare  
51 providers (HCPs) of infants in the NICU to understand the impact of COVID-19 restrictions; and  
52 (2) develop virtual clinical care pathways to meet identified needs.

53 **Methods:** This study used focus groups and individual semi-structured interviews with families  
54 and HCPs for the needs assessment and identification of barriers and facilitators, and co-design  
55 for the development of the clinical virtual care pathways. For objective 1, content analysis was  
56 conducted by two independent reviewers to categorize findings and identify important barriers  
57 and facilitators of family-integrated care. For objective 2, an agile, co-design process utilizing  
58 expert consensus of a large interdisciplinary team was used to develop the care pathways.

59 **Results:** A total of 23 participants were included in the needs assessment (objective 1): 12  
60 families and 11 HCPs. Themes identified were: (1) the need to maintain and build relationships  
61 and support systems; (2) challenges in accessing education and resources to integrate families in  
62 care; and (3) lack of standardized, accessible messaging related to COVID-19. For objective 2,  
63 we used the themes identified in the needs assessment to co-design three clinical virtual care  
64 pathways: (1) building and maintaining relationships between family and healthcare providers;  
65 (2) awareness of resources; and (3) standardized COVID-19 messaging.

66 **Conclusion:** Families reported that restrictive parental presence policies affected their mental  
67 health, well-being and social support. Families and HCPs reported the restrictions impacted  
68 delivery of family integrated care, education, transition to home, and standardized messaging.  
69 Clinical care virtual pathways were designed to meet these needs to ensure more equitable family  
70 centred care.

71

72

73

## 74 **1 Introduction**

75 In response to SARS-CoV-2 (COVID-19), public health restrictions were instituted worldwide to  
76 limit disease transmission and reduce burden on the health care resources and healthcare  
77 provider workforce.<sup>1</sup> One such public health restriction was eliminating or severely restricting  
78 family or support person presence in hospital or clinic settings.<sup>2,3</sup> Despite the known benefits of  
79 parental presence in the neonatal intensive care unit (NICU) settings, to protect the infants,  
80 families and healthcare providers (HCPs), most NICUs also instituted severe parental presence  
81 (visiting) restrictions.<sup>2,3</sup>

82  
83 Each year, 15 million babies are born preterm, defined as less than 37 weeks gestational age,  
84 with the majority requiring neonatal intensive care.<sup>4</sup> Worldwide and in Canada, prematurity is  
85 the leading cause of infant disability and death.<sup>5</sup> While the youngest and sickest infants and their  
86 families are most at risk, even infants delivered one to two weeks early are at risk for immediate  
87 and long-term negative health outcomes. Most notably, infants are at risk of having  
88 developmental delay, and social, emotional and behavioural problems.<sup>6,7</sup>

89  
90 Beyond infant outcomes, parents of these infants report higher levels of immediate stress,  
91 anxiety, depression, posttraumatic stress and greater adverse parenting outcomes than parents of  
92 healthy newborns.<sup>8,9</sup> In order to improve the outcomes of vulnerable infants and their families  
93 and ease health care system burden, strong parental presence and education along with family  
94 integrated interventions have been shown to be a beneficial component of care in the NICU.<sup>10-14</sup>  
95 Infant benefits associated with greater parental presence in the NICU include supportive effects  
96 for brain development,<sup>15</sup> improved stress regulation,<sup>16</sup> infant growth and a reduced length of  
97 stay.<sup>17,18</sup> Greater parental presence and engagement in the NICU has also been associated with  
98 increased parental self-efficacy upon discharge,<sup>19,20</sup> improved parent-infant relationships,<sup>13,17</sup>  
99 decreased parental stress, depression, and anxiety,<sup>11,12,21,22</sup> and increased exclusive breastmilk  
100 feeding at discharge.<sup>10,23</sup>

101  
102 At IWK Health, parental presence restrictions were instituted on March 13<sup>th</sup>, 2020 because of the  
103 local state of emergency declared due to COVID-19. IWK Health is a perinatal and pediatric  
104 university-affiliated referral hospital providing tertiary care to women and children across three  
105 provinces in Eastern Canada. The most severe restrictions limited only one support person to be  
106 present with their infant(s) who could not leave the hospital. If the women who delivered had a  
107 support person during delivery, the mother's support person was required to leave 48 hours after  
108 delivery. These restrictions meant that families who stayed in the NICU with their infant(s)  
109 lacked access to their usual social support systems, partners had little to no access to their  
110 infant(s), and usual in-person teaching and access to resources were adversely affected.  
111 Additionally, some parents with responsibilities such as other children in the home had to leave  
112 the hospital, leaving their infant alone as the parent could not return to the NICU if they left.

113  
114 Despite well intentioned public health decisions to limit the spread of COVID-19, many  
115 questions remain related to the impact of severe parental presence restrictions in the NICU on  
116 infant outcomes and parent mental health and well-being. Moreover, little is known regarding  
117 optimal ways to engage and support families in response to parental presence restrictions.

## 118 **2. Study Team and setting**

120 The Care Optimized using clinical Virtual pathways to Engage and Support NICU families in  
121 response to COVID-19 (COVES) study is comprised of a 20-member diverse interdisciplinary  
122 research team. The team includes parent partners (parents of infants requiring neonatal care),  
123 neonatal HCPs (neonatologists, neonatal nurse practitioners, nurses, educators, discharge  
124 planners, clinical nurse specialist), administrators (managers, directors and executive leaders)  
125 and researchers.

126 The study was conducted at IWK Health. The IWK Health NICU is a 40-bed single family room  
127 (with a designated sleep space, bathroom and shower) unit which provides level 3-4 care to 500-  
128 600 inborn and outborn patients annually. The NICU and hospital has a strong culture supporting  
129 family integrated care.

130

### 131 **3 Methods**

#### 132 **3.1 Objective 1: Needs Assessment**

##### 133 **3.1.1 Aim**

134 The aim of objective 1 was to conduct a needs assessment with families and HCPs of infants in  
135 the NICU to understand the impact of the COVID-19 restrictions and determine care priorities to  
136 ensure optimal family-integrated care. Findings were anticipated to inform objective 2 of the  
137 study.

138

##### 139 **3.1.2 Design**

140 This study used a qualitative research design to conduct a needs assessment through focus groups  
141 and individual semi-structured interviews with families and HCPs. Ethical approval was received  
142 through IWK Health prior to recruitment (REB #1025748).

143

##### 144 **3.1.3 Study population**

145 English speaking families of an infant who was an inpatient in the NICU after March 13th, 2020  
146 were considered eligible. For the purpose of the study, eligible family members were any  
147 primary caregiver of the infant. Families of infants who were palliative were not excluded from  
148 the study but were not actively approached.

149 Healthcare providers were considered eligible if they were providing clinical care in the IWK  
150 Health NICU since March 2020. There were no exclusions based on discipline or years of  
151 experience.

152 Purposeful sampling was also used to ensure a diverse sample, including underrepresented and  
153 equity seeking groups. We aimed to include a minimum of ten participants from each group  
154 (family and HCPs) or until data saturation was reached.

155

##### 156 **3.1.4 Recruitment and Procedures**

157 Virtual recruitment for the needs assessment occurred between May 21<sup>st</sup>, 2020 and June 29<sup>th</sup>,  
158 2020. Given pandemic restrictions, usual in-person recruitment was not permitted. We recruited  
159 using posters in the NICU and through social media posts. Parents were also offered letters from  
160 the clinical team introducing the study and inviting them to participate. Interested families  
161 provided contact information and were contacted by a research coordinator by phone or email.  
162 Healthcare providers were recruited through letters of invitations and interested HCPs provided  
163 their contact information agreeing to be contacted by the research coordinator. All participants  
164 provided written or e-consent and completed an online demographic form. Focus groups and  
165 interviews were conducted via the Zoom video conferencing platform. Participants were

166 provided a secure password protected Zoom link to join a focus group or interview (based on  
167 participant choice). Sessions were between 40 and 60 minutes in length and were recorded and  
168 transcribed. Participants were informed of ways to receive support should the content of the  
169 focus group discussion or interview caused them stress or anxiety.

170  
171 The semi-structured interview guide (supplementary material) was created through existing  
172 evidence and expert consensus of the full research team, comprised of parent partners from  
173 eastern Canada and neonatal clinicians, administrators and researchers who work at the IWK  
174 Health NICU.

### 175 176 **3.1.5 Analysis**

177 The interviews and focus groups were analyzed using inductive thematic qualitative content  
178 analysis.<sup>24</sup> Content analysis was conducted using NVivo 12 by two independent reviewers to  
179 categorize findings and identify the impact of restrictive parental presence policies in the NICU in  
180 response to COVID-19. A third reviewer resolved any disagreements and assisted with creation  
181 of the themes. Follow-up and participant feedback were utilized to ensure credibility and  
182 trustworthiness of the data.<sup>25</sup>

183  
184 To determine potential barriers and facilitators for development and practice uptake, interviews  
185 and focus groups were analyzed using qualitative content analysis and the domains of the  
186 Theoretical Domains Framework (TDF)<sup>26</sup> by two reviewers to categorize findings and identify  
187 important barriers and facilitators. Barriers and facilitators to implementing virtual care pathways  
188 during COVID-19 were identified using the Behaviour Change Wheel (BCW)<sup>27</sup> and TDF.<sup>26</sup>  
189 Priorities for pathway creation were identified with final suggestions for revisions reviewed by  
190 the research team and changes made based on consensus.

## 191 192 **3.2 Results**

193 A total of 23 participants (12 family and 11 HCP) participated. All participants were included in  
194 the analysis. Nine interviews were conducted with family participants and data from the HCPs  
195 were collected through two focus groups and one interview. Family participants included 9  
196 mothers, 2 fathers and 1 grandfather. Healthcare provider participants included 3 registered  
197 nurses, 1 neonatologist, 2 neonatal nurse practitioners, 2 lactation consultant specialists, and 2  
198 pharmacists. All but 2 of the HCPs were female.

199  
200 Overall, while families reported experiencing significant distress, all reported feeling confident  
201 in the quality of care their infant received. Identified needs focused almost exclusively on parent  
202 outcomes related to emotional and physical well-being. Three primary areas emerged that guided  
203 the development of the pathways: (1) the need to maintain and build relationships and support  
204 systems; (2) challenges in accessing education and resources to integrate families in care; (3)  
205 lack of standardized and accessible messaging related to COVID-19 pandemic response.

### 206 207 ***The need to maintain and build relationships and support systems***

208 Parental presence restrictive policies adversely impacted parent and HCPs therapeutic  
209 relationship, parent-family relationships and access to usual social support systems. Parent  
210 mental well-being was negatively impacted by the restrictions of limiting the number of primary  
211 support persons, not allowing primary support persons to come and go, and preventing siblings

212 and extended family members from visiting. Families reported feeling disconnected from their  
213 infant and the care team. Healthcare providers similarly reported feeling disconnected from  
214 families as well as other HCPs. Concerns were raised regarding the ability to establish  
215 therapeutic relationships with families.

216

### 217 *Challenges in accessing education and resources to integrate families in care*

218 Healthcare providers reported that their ability to maintain and foster family integrated care was  
219 adversely affected. Both parents and HCPs reported concerns related to families accessing  
220 educational materials, in-person HCP teaching, and increased burden on some family to teach  
221 other family members at home. This concern was particularly relevant regarding discharge  
222 planning.

223

224 Healthcare providers reported concerns with both themselves and families being left out of usual  
225 care decisions made during daily medical rounds when the number of people permitted at the  
226 patient bedside was reduced as part of the physical distancing policies. Families and HCPs also  
227 reported challenges pivoting to virtual care. Attempts to include HCPs and families using  
228 telephone or video conferencing was associated with concerns related to poor audio quality, fear  
229 of errors being made and issues related to privacy. Issues related to equitable care were raised,  
230 primarily regarding family access to reliable Wi-Fi or devices, and comfort with the use of  
231 virtual resources. Learning needs regarding comfort with technology during rapid pivot to virtual  
232 platforms were also reported.

233

### 234 *Lack of standardized and accessible messaging related to COVID-19 pandemic response*

235 Significant need for standardized, easily accessible COVID-19 messaging in the NICU and  
236 across the women's newborn program for both families and care providers were identified.  
237 Unmet parental physical needs were also reported which included difficulties acquiring  
238 necessary prescriptions, personal items, and clothing. These concerns were greatest in non-local  
239 residents (where closed borders between provinces precluded travel), and immigrant populations.

240

## 241 **3.2 Objective 2: Clinical virtual care pathways**

### 242 **3.2.1 Aim**

243 The aim of objective 2 was to develop clinical virtual care pathways to meet identified needs  
244 from objective 1.

245

### 246 **3.2.2 Study Design**

247 Agile, collaborative co-design process using expert consensus of interdisciplinary team which  
248 included parents, and qualitative interviews with families, clinicians, and decision-makers.<sup>28</sup>

249

### 250 **3.2.3 Study Population**

251 A diverse 20-member interdisciplinary research team which included parents of previous NICU  
252 patients participated to provide expert consensus recommendations on the development of the  
253 co-designed pathways. Qualitative interviews and iterative testing were conducted with families  
254 and HCPs to further adapt and revise pathways. Eligibility criteria were consistent with objective  
255 1. Eligible participants were the intended users of the clinical virtual care pathways, HCPs from  
256 the NICU of IWK Health in Eastern Canada with inclusion and exclusion criteria as noted above.

257



### 258 **3.2.4 Recruitment and Procedures**

259 Recruitment and co-design sessions for objective 2 occurred between July 14<sup>th</sup>, 2020 and  
260 December 1<sup>st</sup>, 2020. To aid in the development of the pathways, weekly smaller working groups  
261 and full team bi-monthly 60-90 minutes virtual interdisciplinary research team meetings were  
262 held. For the purpose of identification of barriers and facilitators and iterative co-design testing  
263 cycles, we used the same recruitment procedures utilized in objective 1. Participants were  
264 prompted using a semi structured interview guide (supplementary material). Iterative bi-monthly  
265 agile co-design sessions and live online documents available to the full research team were  
266 utilized to further adapt and revise the co-designed pathways. Additional need for iterative agile  
267 sessions were determined based on saturation of data obtained.  
268

### 269 **3.2.5 Analysis**

270 Interviews and focus groups were analyzed using qualitative content analysis and the domains of  
271 the TDF by two reviewers to categorize findings and identify important barriers and facilitators.  
272 Barriers and facilitators to implementing virtual care pathways during COVID-19 were identified  
273 using the BCW and TDF.<sup>26,27</sup> All interviews were conducted using a semi-structured interview  
274 guide based on the TDF, created by the full research team. Domains were mapped on to virtual  
275 care functions to guide options for changes. The APEASE intervention criteria of the BCW  
276 (affordability, practicability, effectiveness and cost-effectiveness, acceptability, safety, and  
277 equity) informed decision making.<sup>27</sup> Priorities for pathway creation were identified, and  
278 recommendations for revisions were reviewed by the research team and changes were made  
279 based on consensus.  
280

## 281 **3.3 Results**

### 282 **3.3.1 Pathway Overview**

283 The pathways document a step-by-step process to ensure standardized care is offered to families,  
284 addressing the themes identified in objective 1. While the primary users are likely to be families  
285 and bedside nurses, the entire multidisciplinary care team (i.e., pharmacists, lactation  
286 consultants, advanced practice nurses and physicians) are encouraged to complete the relevant  
287 section of the pathways. The pathways incorporate an algorithmic approach that includes  
288 decision points to take into consideration family scenario and timing. The main introduction page  
289 for the pathways (Figure 1) includes a description of the potential family scenarios that should be  
290 considered for each element of the pathways. This step aims to ensure that all identified primary  
291 parent/caregivers would be contacted regardless of their ability to be present in the NICU. All  
292 elements of the pathways are allocated to one of the following time frames to ensure parent's  
293 received timely information: (1) admission; (2) during stay; or (3) prior to discharge. HCP  
294 documentation associated with each step of the pathways allows HCPs to keep track if the  
295 pathway element was offered regardless of location of family and whether the step was utilized  
296 by families. Follow up prompts are embedded in the pathways to determine if the families have  
297 questions. Educational resources are offered in a virtual format accessible at any time from  
298 hospital or from home. The pathways provide a standardized approach to directing parents to  
299 virtual resources as part of usual care. Virtual resources utilized are part of an existing web-based  
300 evidence based educational platform called Chez NICU Home (CNH), recently developed at  
301 IWK Health, planned to be fully implemented in the NICU prior to the COVID-19 pandemic.  
302 Pandemic research restrictions altered the planned research implementation and practice uptake  
303 of the resource. The platform includes interactive parent training, and education. The CNH

304 platform was developed following user-centered principles of design including iterative testing  
305 and feedback from parent and HCP end users. The platform consists of six core chapters which  
306 include lessons and resource pages broken down into reading resources and video content. There  
307 is also a 12-step Discharge Planning Module, Progress Dashboard, and Interactive Tracker to  
308 record parental presence and involvement in care. The platform includes 14 instructional videos  
309 teaching key parental skills such as car seat safety and pumping breastmilk. The virtual  
310 communication platform utilized in the pathways was created to align with the CNH platform  
311 and was referred to as the CNH Connect. The CNH Connect utilizes a secure WebX video/audio  
312 platform that can be accessed via multiple devices (phone, tablet, in room screen, or computer)  
313 from both in and outside the hospital. The CNH Connect was not available to families and staff  
314 prior to the pandemic restrictions.

### 315 **3.3.2 Clinical Virtual Care Pathways**

316 The three clinical virtual care pathways align with the themes identified in objective 1: (1)  
317 building and maintaining relationships between family and HCPs; (2) awareness of resources;  
318 and (3) standardized messaging related to COVID-19.

319  
320 **Pathway #1 Building and maintaining Relationships** – The aim of the pathway is to get to  
321 know the family. In doing this, we can provide optimal virtual ways to build and foster  
322 relationships between families and their health care team. This helps to identify individual family  
323 needs and preferences, and to support family integration in their baby’s care, whether present in  
324 the NICU or at home (Figure 2).

325  
326 **Pathway #2 Awareness of Resources** – The aim of this pathway is to ensure that families have  
327 equitable awareness and access to evidence-based resources both virtually and in person. The  
328 pathway provides optimal ways to connect families through access to a secure video  
329 conferencing system, and to education through virtual and in-person resources which include all  
330 aspects of the infant’s NICU stay and discharge needs (Figure 3).

331  
332 **Pathway #3 Standardized Messaging – COVID-19** – The aim of this pathway is to address the  
333 rapid changes to public health guidelines and institutional policies as a result of COVID-19. This  
334 will ensure families and HCPs have better and consistent access to the standardized messaging  
335 they need to navigate through the NICU presence policies and receive the most current  
336 information on COVID-19 (Figure 4).

### 337 338 **Barriers and facilitators to practice uptake**

339 To help determine barriers and facilitators to pathway acceptance and feasibility for  
340 implementation and practice uptake, we interviewed ten participants between October 25<sup>th</sup>, 2020  
341 and November 25<sup>th</sup>, 2020. This included one family member (mother) and nine HCPs (7 nurses;  
342 1 neonatal nurse practitioner; and 1 pharmacist).

343  
344 The participants reported feeling somewhat overwhelmed when initially seeing the pathways but  
345 when provided opportunity to review the pathways, they agreed that all of the elements were  
346 relevant. There were some suggestions for wording changes related to equity and offering  
347 devices to families in NICU to use for resources and attendance at rounds. Wording changes to  
348 put more emphasis on the purpose for virtual care and transparency, clarity around exceptions  
349 and an emphasis on ensuring families have access to food were also suggested.



350

351 Most HCPs felt confident to complete the steps of the pathway. Some identified that aspects of  
352 the pathways required additional information and resources, most notably standardized  
353 messaging to families and additional training related to onboarding families to virtual  
354 communication and educational resources. Concerns were raised around the potential increased  
355 nursing workload. However, participants identified family questions as part of the existing  
356 charting admission process that could be potentially integrated as part of the pathways to  
357 streamline care and reduce duplication.

358

359 Families felt that pathway elements were relevant and time frames were reasonable. They  
360 identified the importance of a space to record reasons for delay or exceptions to completing any  
361 elements of the pathways. Families also reported the importance of ensuring that HCPs did not  
362 pressure families by prescribing the pathways but direct the families to the resources, allowing  
363 them to freely make the decision about whether to use them or not. Families raised the  
364 importance of completing the pathways “with families” rather than “to families,” as well as the  
365 need to be more inclusive of fathers.

366

### 367 *Iterative Pathways revisions*

368 Changes to the pathways were made based on user responses and expert consensus of the full co-  
369 design research team input and co-design sessions. The following changes or additions were  
370 made to inform final pathways.

371

372 To inform learning needs and standardized messaging, a user guide (see supplemental materials)  
373 and a script (main page of pathways (Figure 2) were created and added. To emphasize the  
374 integration of families, elements of the pathways were rephrased as questions using simplified  
375 language versus using statements. The terminology “father /partner” was added versus only  
376 partner to be more inclusive of fathers.

377

378 To reduce nursing workload, existing family targeted questions from the unit’s current admission  
379 documentation was removed and incorporated as part of the pathways. Information was added to  
380 clarify that all care providers should participate in completing relevant aspects of the pathways.  
381 For example, the lactation consultant directing a family to the online education module and video  
382 regarding pumping breastmilk and safe storage, or the pharmacist directing a family to view the  
383 online video about giving medications. It was decided that unit ward clerks would assist with the  
384 on-boarding process for the educational (CNH) and communication (CNH Connect) platforms.  
385 All staff will be provided training on use of the pathways in a 14 day in-person roll-out and  
386 would be provided access to written and online resources (user guide and training presentation).

387

### 388 **3.4 Discussion**

389 We aimed to determine the impact of parental presence restrictions in response to the COVID-19  
390 pandemic on parents of infants requiring neonatal intensive care, as well as develop clinical  
391 virtual pathways to address identified needs of families to better engage and support families to  
392 be fully integrated as part of their infant’s care team. The development of the virtual clinical care  
393 pathways was done through an agile, collaborative process based on the needs identified from  
394 NICU families and HCPs. To enact meaningful change, decisions on the format of these  
395 pathways were responsive to the needs of families and pragmatic in considering current unit

396 practices. As such, the pathways were formatted to use a low-tech approach of an interactive  
397 PDF, while the contents of the pathways standardized the use of virtual solutions for optimizing  
398 clinical care.

#### 400 **3.4.1 Needs Assessment**

401 Our findings indicate the substantial impact that families experienced during severe parental  
402 presence restrictions instituted in response to the COVID-19 pandemic, consistent with a recent  
403 global survey of 277 facilities that reported a significant reduction on parental presence and  
404 engagement across NICUs.<sup>2</sup>

405  
406 Interestingly, few families and HCPs expressed concerns regarding the impact of COVID-19  
407 parental presence restrictions on infant outcomes, while all emphasized the impact on  
408 parent/family well-being. Identified needs focused almost exclusively on parent outcomes related  
409 to emotional and physical well-being. Our findings are in keeping with previous reports of  
410 altered family well-being during an infant's NICU stay irrespective of COVID-19,<sup>11,12,21,22</sup> as  
411 well as heightened concerns during the pandemic.<sup>29</sup> Nevertheless, this is somewhat surprising  
412 given the known benefit of parental presence on infant outcomes.<sup>15-18</sup> This may reflect a  
413 significant level of confidence in the care provided by the NICU team, a lack of insight or  
414 underappreciation regarding the important contribution of parental presence on infant outcomes,  
415 or simply that the degree of personal parent/family distress was too great to move beyond.  
416 Further inquiry is warranted to elucidate this finding.

#### 417 418 **3.4.2 Co-Design of Clinical Care Pathways**

419 The pathways were co-designed with parents, families, clinicians, decision-makers, and  
420 researchers based on findings from the needs assessment and continuously informed by the  
421 COVES team. Collaboration and creative feedback/input from the large, diverse COVES team  
422 and NICU families/current NICU staff/HCPs were essential components to the design stage to  
423 create a resource that would be relevant to practice and have a high likelihood of acceptance and  
424 uptake when incorporated into clinical practice to optimize care.

425  
426 Co-design and participatory design have been demonstrated as an effective method for  
427 development of virtual and eHealth resources, specifically in the perinatal population,<sup>30</sup> and in  
428 designing clinical care pathways to meet the unique needs of specific populations.<sup>31</sup> The co-  
429 design/participatory design approach aligns with the philosophy of family-integrated care  
430 (upheld by the study institution) in that the health system is adapted to the specific needs of its  
431 population, and the only true way to achieve that is with the input of the population.<sup>29-32</sup>

#### 432 433 **3.4.3 Pivoting to Virtual Care**

434 Pivoting to virtual care was necessary to optimize clinical care during the period of uncertainty  
435 and in-person interaction limitations due to parental presence restrictions enforced for the  
436 pandemic. The value of virtual care was quickly acknowledged by many in healthcare systems  
437 and widely pursued to maintain support and care for the community.<sup>33-35</sup>

438  
439 In response to the needs assessment and need for a development of an intervention that was  
440 tailored to our institution/NICU, we decided to first create the suite of pathways in paper form  
441 and as interactive PDF to ensure these pathways could easily be adopted into clinical practice

442 and patient documentation. The initial paper version allowed for rapid and responsive revisions  
443 to be made during development as well as throughout the initial roll out and implementation. The  
444 pathways currently will exist as part of the paper-based charting system but will also be housed  
445 digitally as the interactive PDF for information purposes.

446  
447 Throughout this study, the process of designing the clinical care pathways acted as a catalyst for  
448 greater uptake of existing virtual care platforms within the NICU and across the institution. As  
449 previously mentioned, IWK Health has already integrated prior to the pandemic CNH and CNH  
450 Connect within their NICU, which is a virtual, eHealth education and connection platform. Thus,  
451 the virtual pathways offer the opportunity to systematize the introduction of the CHN platform to  
452 incoming patients, particularly in pathway 2. For example, in this pathway, there is increased  
453 opportunity for uptake of CNH through standardized onboarding practices with families in the  
454 NICU or at home. Additionally, it triggered rapid implementation of the CNH Connect to ensure  
455 family at home were incorporated into their infant's care and decision making through virtual  
456 rounds. In the beginning of the pandemic and presence restrictions, families joined rounds  
457 virtually through technologies like FaceTime and Zoom, yet due to the critical nature of this  
458 environment and need for high quality infection control practices, any equipment (e.g., computer  
459 for Zoom) could not enter patient rooms. This barrier was shared across adult ICUs, which  
460 became a greater issue as many hospitals restricted family presence entirely.<sup>36</sup> Expediting the  
461 rollout of CHN Connect enhanced virtual rounds significantly, as it allowed families and other  
462 HCPs to easily join virtual rounds, enhanced patient privacy, and enhanced care through more  
463 effective communication. Other critical care areas utilized similar systems/platforms to facilitate  
464 presence when physical presence of families was restricted, which was reported to be incredibly  
465 impactful to the whole family unit specifically with their mental wellbeing.<sup>36</sup>

#### 466 467 **3.4.4 Strengths and Limitations**

468 The primary strength of this project was that the pathways were designed using user-centered  
469 design strategies.<sup>37</sup> This included the needs assessment to define user/target audience, co-  
470 creation sessions (co-design), designed occurred through collaboration with multiple teams, the  
471 use of focus groups to gain user perspective, and iterative developments. As the goal of this  
472 project was to create a solution to optimize clinical care during the pandemic, it was imperative  
473 that we designed evidence-based care pathways. Dopp and colleagues state that applying a  
474 variety of user-centered design strategies facilitates the development of “evidence-based practice  
475 services, technologies, and implementation plans that address identified needs” (p.1059).<sup>37</sup>

476  
477 However, despite this strength, there are some limitations that must be acknowledged. First, due  
478 to the constantly changing nature of the guidelines related to COVID-19 policies, difficulties  
479 emerged in connecting and engaging with users throughout this process. Difficulties arose  
480 recruiting families to participate as family members had to initiate contact with the study team to  
481 begin the virtual recruitment process. Another challenge was the implementation of the pathways  
482 as a completely virtual tool. Due to the iterative nature needed in the design and development,  
483 the pathways were initially piloted as a paper copy with transition occurring into an interactive  
484 PDF document for the ongoing pilot testing. Future incorporation into the CNH platform is  
485 desired.

## 486 487 **4 Conclusion**

488

489 COVID-19 policies restricted family presence and involvement in the NICU. Families reported  
490 that this affected their mental health, well-being and social support. Both families and HCPs  
491 reported the restrictions significantly impacted usual in-person parent integration in care, parent  
492 education and transition to home. Rapid change and variation of restrictive presence policies  
493 across multiple women and newborn departments and lack of easily accessible standardized  
494 messaging regarding policies were identified by both families and HCPs as a highly stressful and  
495 significant concern. Virtual clinical care pathways were developed to meet these needs and  
496 preliminary feedback suggests that the clinical implementation of these pathways will ensure  
497 more equitable family centred care across all parent scenarios regardless of whether they are in  
498 the hospital and/or at home.

499

500

501 **5. Conflict of Interest**

502 The authors declare that the research was conducted in the absence of any commercial or  
503 financial relationships that could be construed as a potential conflict of interest.

504

505 **6 Author Contribution**

506 Author MCY conceptualized the manuscript and wrote the first draft of the manuscript and  
507 edited all revisions. HM, BR, JD, AH and SF contributed substantial content to the paper. All co-  
508 authors were actively involved in all aspects of the study and creation of the pathways. All co-  
509 authors approved the paper.

510

511 **7 Funding**

512 Funding for this project was from the Nova Scotia COVID-19 Health Research Coalition  
513 through the IWK Foundation.

514

515 **8 Contribution to the field**

516 Irrespective of a pandemic, the majority of parents of preterm infants experience high levels of  
517 stress, uncertainty, challenges navigating their role in the NICU and ability to be fully integrated  
518 as part of their infant's care. Our study demonstrated the significant heightened impact of  
519 COVID-19 parental presence restrictions on parent well-being and identified gaps in care and  
520 identified key priority areas of need to promote family integrated care practices and engagement  
521 during the pandemic. The creation of clinical virtual pathways provided a standard and equitable  
522 approach to provide virtual family integrated care, including parental education and training  
523 while COVID-19 restrictions have limited our ability to deliver care face-to-face. Our findings  
524 will inform the feasibility, acceptability, and impact of prescribing a virtual care platform to deliver  
525 education and support to families of infants admitted an NICU within a family integrated care  
526 model. Evaluating the implementation and effectiveness of the pathways into care is warranted.  
527 In the future, beyond the COVID-19 pandemic, continued use of the care pathways may also  
528 have long term benefits particularly for rural, remote, and vulnerable families who are unable to  
529 ensure ongoing presence in the NICU.

530

531



532 **9 References**

- 533 1. World Health Organization. Coronavirus disease (COVID-19) pandemic. *Webpage*  
534 <https://www.who.int/emergencies/diseases/novel-coronavirus-2019> (2020).
- 535 2. Darcy Mahoney, A. *et al.* Impact of restrictions on parental presence in neonatal intensive  
536 care units related to coronavirus disease 2019. *Journal of Perinatology* **40**, 36–46 (2020).
- 537 3. Bembich, S. *et al.* Parents experiencing NICU visit restrictions due to COVID-19 pandemic.  
538 *Acta Paediatrica*, (2020).
- 539 4. World Health Organization. Preterm birth. *Webpage* [https://www.who.int/news-room/factsheets/detail/preterm-birth#:~:text=Every year%2C an estimated 15,deaths in 2015 \(1\).](https://www.who.int/news-room/factsheets/detail/preterm-birth#:~:text=Every year%2C an estimated 15,deaths in 2015 (1).)  
540 (2018).
- 541
- 542 5. Liu, L. *et al.* Global, regional, and national causes of under-5 mortality in 2000–2013;15:  
543 an updated systematic analysis with implications for the Sustainable Development Goals.  
544 *The Lancet* **388**, 3027–3035 (2016).
- 545 6. Moster, D., Lie, R. T. & Markestad, T. Long-term medical and social consequences of  
546 preterm birth. *The New England journal of medicine* **359**, 262–273 (2008).
- 547 7. Woythaler, M. Neurodevelopmental outcomes of the late preterm infant. *Seminars in fetal &*  
548 *neonatal medicine* **24**, 54–59 (2019).
- 549 8. Schecter, R. *et al.* Prevalence and Longevity of PTSD Symptoms Among Parents of NICU  
550 Infants Analyzed Across Gestational Age Categories. *Clinical pediatrics* **59**, 163–169  
551 (2020).
- 552 9. Roque, A. T. F., Lasiuk, G. C., Radünz, V. & Hegadoren, K. A Scoping Review of the  
553 Mental Health of Parents of Infants in the NICU. *Journal of Obstetric, Gynecologic &*  
554 *Neonatal Nursing* **46**, 1–12 (2017).
- 555 10. O'Brien, K. *et al.* Effectiveness of Family Integrated Care in neonatal intensive care units on  
556 infant and parent outcomes: a multicentre, multinational, cluster-randomised controlled trial.  
557 *The Lancet Child and Adolescent Health* **2**, 245–254 (2018).
- 558 11. Cheng, C. *et al.* Evaluating the effect of Family Integrated Care on maternal stress and  
559 anxiety in neonatal intensive care units. *Journal of reproductive and infant psychology* 1–14  
560 (2019) doi:10.1080/02646838.2019.1659940.
- 561 12. Tandberg, B. S., Flacking, R., Markestad, T., Grundt, H. & Moen, A. Parent psychological  
562 wellbeing in a single-family room versus an open bay neonatal intensive care unit. *PLoS*  
563 *ONE* **14**, 1–18 (2019).
- 564 13. Franck, L. S. & O'Brien, K. The evolution of family-centered care: From supporting parent-  
565 delivered interventions to a model of family integrated care. *Birth Defects Research* vol. 111  
566 1044–1059 (2019).
- 567 14. O'Brien, K., Lui, K., Tarnow-Mordi, W. & Lee, S. K. Breastfeeding data in the Family  
568 Integrated Care trial. *The Lancet. Child & adolescent health* vol. 2 e5 (2018).
- 569 15. Myers, M. M. *et al.* Family Nurture Intervention in preterm infants alters frontal cortical  
570 functional connectivity assessed by EEG coherence. *Acta paediatrica (Oslo, Norway)*:  
571 *1992* **104**, 670–677 (2015).
- 572 16. Feldman, R., Rosenthal, Z. & Eidelman, A. I. Maternal-preterm skin-to-skin contact  
573 enhances child physiologic organization and cognitive control across the first 10 years of  
574 life. *Biological Psychiatry* **75**, 56–64 (2014).
- 575 17. Jiang, S., Warre, R., Qiu, X., O'Brien, K. & Lee, S. K. Parents as practitioners in preterm  
576 care. *Early human development* **90**, 781–785 (2014).

- 577 18. Gonya, J., Martin, E., McClead, R., Nelin, L. & Shepherd, E. Empowerment programme for  
578 parents of extremely premature infants significantly reduced length of stay and readmission  
579 rates. *Acta Paediatrica* **103**, 727–731 (2014).
- 580 19. Shorey, S., Chan, S. W.-C., Chong, Y. S. & He, H.-G. Maternal parental self-efficacy in  
581 newborn care and social support needs in Singapore: a correlational study. *Journal of*  
582 *clinical nursing* **23**, 2272–2282 (2014).
- 583 20. Ribeiro, N. & Kase, J. The evolution of parental self-efficacy in knowledge and skill in the  
584 home care of preterm infants. *Journal of Pediatric and Neonatal Individualized Medicine* **6**,  
585 e060118 (2017).
- 586 21. Franck, L. S., Waddington, C. & O'Brien, K. Family Integrated Care for Preterm Infants.  
587 *Critical care nursing clinics of North America* **32**, 149–165 (2020).
- 588 22. Kim, T. H. M., Delahunty-Pike, A. & Campbell-Yeo, M. Effect of Fathers' Presence and  
589 Involvement in Newborn Care in the NICU on Mothers' Symptoms of Postpartum  
590 Depression. *JOGNN - Journal of Obstetric, Gynecologic, and Neonatal Nursing* **49**, 452–463  
591 (2020).
- 592 23. He, S.-W. *et al.* Impact of family integrated care on infants' clinical outcomes in two  
593 children's hospitals in China: a pre-post intervention study. *Italian journal of pediatrics* **44**,  
594 65 (2018).
- 595 24. Elo, S. & Kyngäs, H. The qualitative content analysis process. *Journal of Advanced Nursing*  
596 **62**, 107–115 (2008).
- 597 25. Shenton, A. K. Strategies for ensuring trustworthiness in qualitative research projects.:  
598 University of Liverpool Library. *Education for Information* **22**, 63–75 (2004).
- 599 26. Atkins, L. *et al.* A guide to using the Theoretical Domains Framework of behaviour change  
600 to investigate implementation problems. *Implementation Science* **12**, 1–18 (2017).
- 601 27. Michie, S., van Stralen, M. M. & West, R. The behaviour change wheel: A new method for  
602 characterising and designing behaviour change interventions. *Implementation Science* **6**, 42  
603 (2011).
- 604 28. Thabrew, H., Fleming, T., Hetrick, S. & Merry, S. Co-design of eHealth Interventions With  
605 Children and Young People. *Frontiers in psychiatry* **9**, 481 (2018).
- 606 29. Goeman, D., King, J. & Koch, S. Development of a model of dementia support and pathway  
607 for culturally and linguistically diverse communities using co-creation and participatory  
608 action research. *BMJ Open* **6**, e013064 (2016).
- 609 30. Thompson, L., Andreas, B., Phillips, K., Sullivan-Taylor, P. & Laxton, S. People-centred  
610 integrated care: co-designing standards - igniting a movement. *International Journal of*  
611 *Integrated Care* **19**, 599 (2019).
- 612 31. Jackson, C., Janamian, T., Booth, M. & Watson, D. Creating health care value together: a  
613 means to an important end. *Med J Aust* **204**, S3-4 (2016).
- 614 32. Hickie, I. B. *et al.* Project Synergy: co-designing technology-enabled solutions for Australian  
615 mental health services reform. *The Medical journal of Australia* **211 Suppl 7**, S3–S39  
616 (2019).
- 617 33. Badawy, S. & Radovic, A. Digital Approaches to Remote Pediatric Health Care Delivery  
618 During the COVID-19 Pandemic: Existing Evidence and a Call for Further Research. *JMIR*  
619 *Pediatr Parent* **3**, (2020).
- 620 34. Webster, P. Virtual health care in the era of COVID-19. *Lancet* **11**, 10231 (2020).
- 621 35. Wosik, J. *et al.* Telehealth transformation: COVID-19 and the rise of virtual care. *Journal of*  
622 *the American Medical Informatics Association* □: *JAMIA* **27**, 957–962 (2020).

- 623 36. Dhala, A., Sasangohar, F., Kash, B., Ahmadi, N. & Masud, F. Rapid Implementation and  
624 Innovative Applications of a Virtual Intensive Care Unit During the COVID-19 Pandemic:  
625 Case Study. *J Med Internet Res* **22**, e20143 (2020).
- 626 37. Dopp, A. R., Parisi, K. E., Munson, S. A. & Lyon, A. R. A glossary of user-centered design  
627 strategies for implementation experts. *Translational behavioral medicine* **9**, 1057–1064  
628 (2019).
- 629
- 630

631  
632  
633  
634  
635  
636  
637  
638  
639  
640  
641  
642  
643  
644  
645  
646  
647  
648  
649  
650  
651  
652  
653  
654  
655  
656  
657  
658  
659  
660  
661  
662  
663  
664  
665  
666  
667  
668

# COVES Virtual Care Pathways

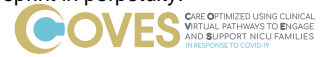

## Purpose

To ensure optimal care for NICU families through engagement and support using virtual care pathways.

## Benefits

Standardized, transparent, and equitable care to enhance parent engagement, and family and infant outcomes.

## Expectations

Nursing staff are required to ensure each intervention on the pathway is completed at the appropriate time point.

## Instructions

Please initial and date each intervention on the pathway at appropriate time point, for each family member identified.

Please complete Pathways 1-3 with the family.

*Suggested script:*

“These pathways are intended to help you and your family and other NICU families. We want to know more about you and let you know more about us and the NICU. Since everyone learns differently, we are providing information and education both through pamphlets and virtually so that you can refer back at all times. Virtual care is not to replace face-to-face discussion with your healthcare providers, please remember that we are always here for you to answer any questions you have.”

### P1 Building & Maintaining Relationships + view between family and health care providers

This virtual care pathway provides optimal ways to build and foster relationships between families and their health care team, to identify individual family needs and preferences, and to support family integration in their baby’s care, whether present in the NICU or at home.

### P2 Awareness of Resources + view

This virtual care pathway provides optimal ways to connect families through access to a secure video conferencing system, and to provide education through virtual and in-person evidence based resources which include all aspects of your baby’s NICU stay and discharge needs.

### P3 Standardized Messaging - COVID-19 + view

This virtual care pathway ensures standardized messaging by directing families to up-to-date information on COVID-19 and the current NICU Presence Policies.

## Parental\* Presence Family Dynamic Scenarios

**\*or infant support person/s**  
or 1 parent/support person if single parent dynamic

### 2 parents\* present in the NICU

Complete all interventions as outlined in each pathway, at appropriate time point.

### 1 parent\* present in the NICU, 1 at home

Complete all interventions as outlined in each pathway with parent\* present in NICU

Connect with and complete all interventions with parent\* at home

Emphasize communication via virtual platforms

### No parents\* present in the NICU

Connect with and complete all interventions with both parents\* at home

Emphasize communication via virtual platforms

## Pathway Time Points

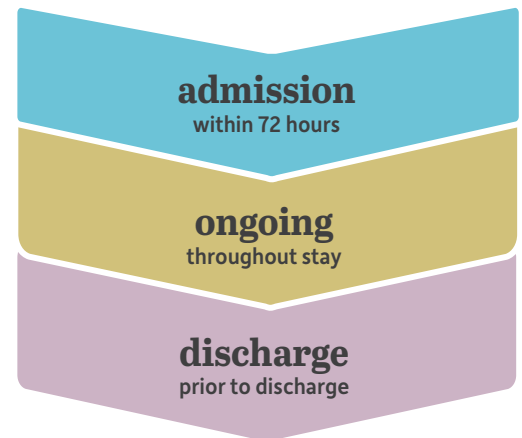

## NICU Entry

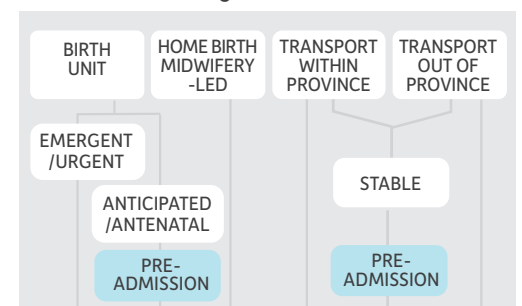



OFFER EACH INDIVIDUAL IN THE IDENTIFIED FAMILY DYNAMIC ALL ELEMENTS OF THE PATHWAY.

DATE & INITIAL AS COMPLETED FOR EACH PERSON.

There is a notes section provided at bottom of page for answers that require more space.

Time Point

admission - within 72 hours

**1** Identify primary location of family/ family dynamic

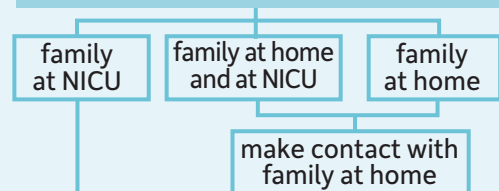

**2** What is your family's preferred language?

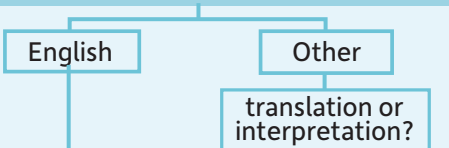

**3** Have you had any difficulties accessing food while in the NICU?

**4** Are there family/cultural practices important to you while in NICU?

**5** Do you feel supported in feeding your baby?

**6** Have you been able to cope with your day-to-day stress?

**7** Has your family been able to fulfill your pharmacy needs?

**8** Are your involvement expectations/ goals being achieved?

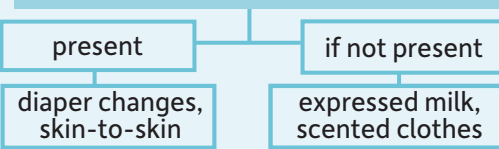

**9** Discuss ways family can be involved in NICU

**ongoing**

**10** Do you feel your educational needs are being met? (if applicable)

**11** Do you feel you are being fully integrated in your baby's care?

**12** Do you feel your day-to-day emotional and nutritional needs are being met?

**discharge**

**13** Are your family's pharmacy needs being met?

**14** Connect family with Discharge Coordinator (if applicable)

**1** Who is in NICU? or circle: n/a

mother  yes  no  
 father/partner  yes  no  
 \_\_\_\_\_  yes  no

Who is at home? or circle: n/a

mother  yes  no  
 father/partner  yes  no  
 \_\_\_\_\_  yes  no

Contacted family at home? or circle: n/a

mother  yes  no  
 father/partner  yes  no  
 \_\_\_\_\_  yes  no

Referred to social work?  yes  no

**2** Primary language?

mother \_\_\_\_\_ D / M / Y  
 father/partner \_\_\_\_\_ D / M / Y  
 \_\_\_\_\_ D / M / Y

Translation required? or circle: n/a

mother  yes  no  
 father/partner  yes  no  
 \_\_\_\_\_  yes  no

**3** Discussed? or circle: n/a

mother  yes  no  
 father/partner  yes  no  
 \_\_\_\_\_  yes  no

**4** Discussed? or circle: n/a

mother  yes  no  
 father/partner  yes  no  
 \_\_\_\_\_  yes  no

Documented?  yes  no

**5** Feeding plan discussed? or circle: n/a

mother  yes  no  
 father/partner  yes  no  
 \_\_\_\_\_  yes  no

Referred to lactation consultant?  yes  no

**6** Discussed? or circle: n/a

mother  yes  no  
 father/partner  yes  no  
 \_\_\_\_\_  yes  no

**7** Medication/equipment needs discussed? or circle: n/a

mother  yes  no  
 father/partner  yes  no  
 \_\_\_\_\_  yes  no

**8** Discussed? or circle: n/a

mother  yes  no  
 father/partner  yes  no  
 \_\_\_\_\_  yes  no

Documented?  yes  no

**9** Discussed? or circle: n/a

mother  yes  no  
 partner  yes  no  
 \_\_\_\_\_  yes  no

**10** Ongoing education needs discussed? or circle: n/a

mother D / M / Y  
 father/partner D / M / Y  
 \_\_\_\_\_ D / M / Y

**11** Family integration in care discussed? or circle: n/a

mother D / M / Y  
 father/partner D / M / Y  
 \_\_\_\_\_ D / M / Y

**12** Psychosocial/nutritional needs discussed? or circle: n/a

mother D / M / Y  
 father/partner D / M / Y  
 \_\_\_\_\_ D / M / Y

**13** Medication/equipment needs discussed? or circle: n/a

mother D / M / Y  
 father/partner D / M / Y  
 \_\_\_\_\_ D / M / Y

**14** Connected with discharge coordinator?  yes  no

NOTES/COMMENTS as well as any EXCEPTIONS/POTENTIAL DELAYS:

---



---



---



---



---

OFFER EACH INDIVIDUAL IN THE IDENTIFIED FAMILY DYNAMIC ALL ELEMENTS OF THE PATHWAY.

DATE & INITIAL AS COMPLETED FOR EACH PERSON.

There is a notes section provided at bottom of page for answers that require more space.

Time Point

admission - within 72 hours

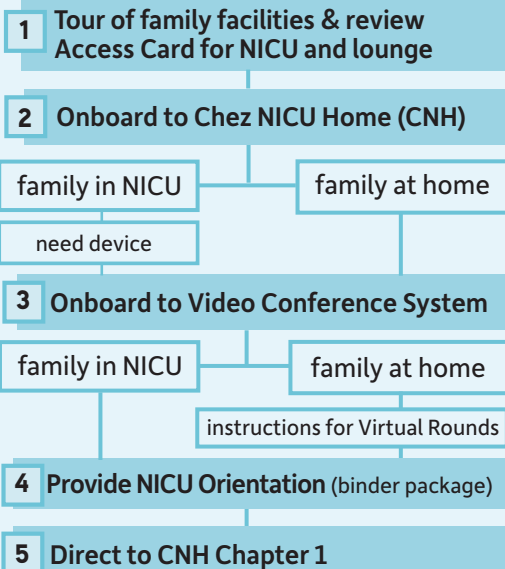

ongoing

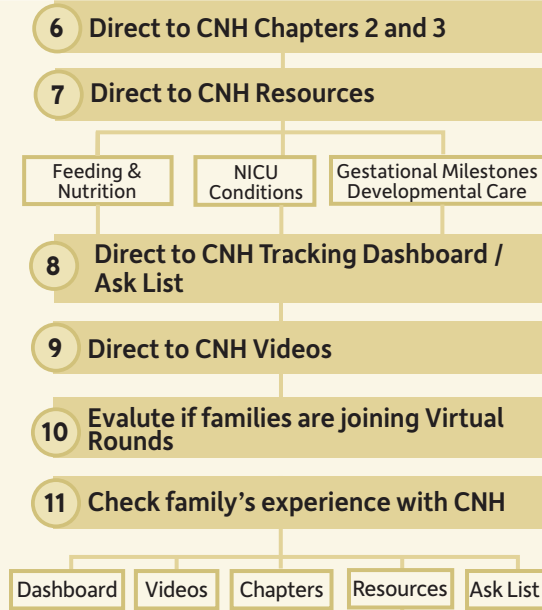

discharge

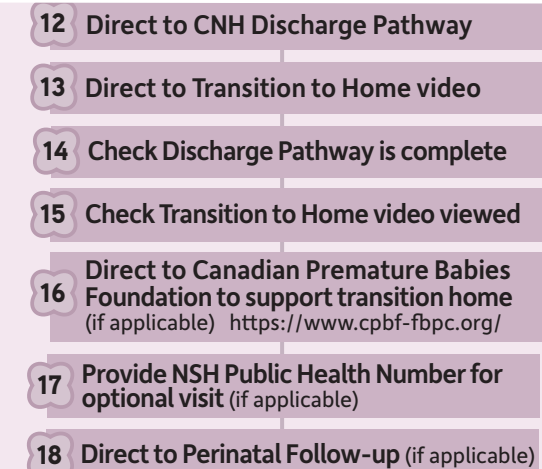

partner = father or partner, \_\_\_\_\_ = other

Date Initial

| Step | Description                                      | mother                                                                                                                                             | partner                                                                                                                                             | _____                                                                                                                                             | Date      | Initial |
|------|--------------------------------------------------|----------------------------------------------------------------------------------------------------------------------------------------------------|-----------------------------------------------------------------------------------------------------------------------------------------------------|---------------------------------------------------------------------------------------------------------------------------------------------------|-----------|---------|
| 1    | Provided and reviewed?                           | <input type="checkbox"/> tour <input type="checkbox"/> access card                                                                                 | <input type="checkbox"/> tour <input type="checkbox"/> access card                                                                                  | <input type="checkbox"/> tour <input type="checkbox"/> access card                                                                                | D / M / Y |         |
| 2    | Offered?                                         | <input type="checkbox"/> yes <input type="checkbox"/> accepted <input type="checkbox"/> declined                                                   | <input type="checkbox"/> yes <input type="checkbox"/> accepted <input type="checkbox"/> declined                                                    | <input type="checkbox"/> yes <input type="checkbox"/> accepted <input type="checkbox"/> declined                                                  | D / M / Y |         |
|      | Family needs a device?                           | <input type="checkbox"/> yes <input type="checkbox"/> no                                                                                           |                                                                                                                                                     |                                                                                                                                                   | D / M / Y |         |
|      | If yes, who received?                            | mother <input type="checkbox"/>                                                                                                                    | partner <input type="checkbox"/>                                                                                                                    | _____ <input type="checkbox"/>                                                                                                                    | D / M / Y |         |
| 3    | Offered?                                         | <input type="checkbox"/> yes <input type="checkbox"/> no                                                                                           | <input type="checkbox"/> yes <input type="checkbox"/> no                                                                                            | <input type="checkbox"/> yes <input type="checkbox"/> no                                                                                          | D / M / Y |         |
|      | Instructions provided? or circle: n/a            | mother <input type="checkbox"/> yes <input type="checkbox"/> no                                                                                    | partner <input type="checkbox"/> yes <input type="checkbox"/> no                                                                                    | _____ <input type="checkbox"/> yes <input type="checkbox"/> no                                                                                    | D / M / Y |         |
| 4    | Directed to Orientation package?                 | <input type="checkbox"/> mother                                                                                                                    | <input type="checkbox"/> father/partner                                                                                                             | <input type="checkbox"/> _____                                                                                                                    | D / M / Y |         |
| 5    | Directed to Chapter 1? or circle: n/a            | <input type="checkbox"/> mother                                                                                                                    | <input type="checkbox"/> father/partner                                                                                                             | <input type="checkbox"/> _____                                                                                                                    | D / M / Y |         |
| 6    | Directed to Chapters? or circle: n/a             | <input type="checkbox"/> mother                                                                                                                    | <input type="checkbox"/> father/partner                                                                                                             | <input type="checkbox"/> _____                                                                                                                    | D / M / Y |         |
| 7    | Directed to Resources? or circle: n/a            | <input type="checkbox"/> mother                                                                                                                    | <input type="checkbox"/> father/partner                                                                                                             | <input type="checkbox"/> _____                                                                                                                    | D / M / Y |         |
| 8    | Directed to Dashboard? or circle: n/a            | <input type="checkbox"/> mother                                                                                                                    | <input type="checkbox"/> father/partner                                                                                                             | <input type="checkbox"/> _____                                                                                                                    | D / M / Y |         |
|      | Directed to Ask List? or circle: n/a             | <input type="checkbox"/> mother                                                                                                                    | <input type="checkbox"/> father/partner                                                                                                             | <input type="checkbox"/> _____                                                                                                                    | D / M / Y |         |
| 9    | Directed to Videos? or circle: n/a               | <input type="checkbox"/> mother                                                                                                                    | <input type="checkbox"/> father/partner                                                                                                             | <input type="checkbox"/> _____                                                                                                                    | D / M / Y |         |
| 10   | Who has joined? or circle: n/a                   | <input type="checkbox"/> mother                                                                                                                    | <input type="checkbox"/> father/partner                                                                                                             | <input type="checkbox"/> _____                                                                                                                    | D / M / Y |         |
| 11   | Who has used CNH? or circle: n/a                 | <input type="checkbox"/> mother                                                                                                                    | <input type="checkbox"/> father/partner                                                                                                             | <input type="checkbox"/> _____                                                                                                                    | D / M / Y |         |
|      | Which sections?                                  | mother <input type="checkbox"/> Da <input type="checkbox"/> Vi <input type="checkbox"/> Ch <input type="checkbox"/> Re <input type="checkbox"/> As | partner <input type="checkbox"/> Da <input type="checkbox"/> Vi <input type="checkbox"/> Ch <input type="checkbox"/> Re <input type="checkbox"/> As | _____ <input type="checkbox"/> Da <input type="checkbox"/> Vi <input type="checkbox"/> Ch <input type="checkbox"/> Re <input type="checkbox"/> As | D / M / Y |         |
|      | Dashboard, Videos, Chapters, Resources, Ask List |                                                                                                                                                    |                                                                                                                                                     |                                                                                                                                                   | D / M / Y |         |
| 12   | Directed to Discharge Pathway? or circle: n/a    | <input type="checkbox"/> mother                                                                                                                    | <input type="checkbox"/> father/partner                                                                                                             | <input type="checkbox"/> _____                                                                                                                    | D / M / Y |         |
| 13   | Directed to video? or circle: n/a                | <input type="checkbox"/> mother                                                                                                                    | <input type="checkbox"/> father/partner                                                                                                             | <input type="checkbox"/> _____                                                                                                                    | D / M / Y |         |
| 14   | Pathway completed? or circle: n/a                | <input type="checkbox"/> mother                                                                                                                    | <input type="checkbox"/> father/partner                                                                                                             | <input type="checkbox"/> _____                                                                                                                    | D / M / Y |         |
| 15   | Video viewed? or circle: n/a                     | <input type="checkbox"/> mother                                                                                                                    | <input type="checkbox"/> father/partner                                                                                                             | <input type="checkbox"/> _____                                                                                                                    | D / M / Y |         |
| 16   | Directed to CPBF?                                | <input type="checkbox"/> yes <input type="checkbox"/> no                                                                                           |                                                                                                                                                     |                                                                                                                                                   | D / M / Y |         |
| 17   | Directed to NSH?                                 | <input type="checkbox"/> yes <input type="checkbox"/> no                                                                                           |                                                                                                                                                     |                                                                                                                                                   | D / M / Y |         |
| 18   | Directed to PFU?                                 | <input type="checkbox"/> yes <input type="checkbox"/> no                                                                                           |                                                                                                                                                     |                                                                                                                                                   | D / M / Y |         |

NOTES/COMMENTS as well as any EXCEPTIONS/POTENTIAL DELAYS:

---



---



---

see interdisciplinary notes
